# Supplementary material
Source: publisher site journal article supplement (https://www.spandidos-publications.com/8655/downloadSupplementary)
Supplement: Supplementary file 1 [file downloadSupplementary]

Figure S1. 4-PBA treatment resensitizes sunitinib-resistant ccRCC cells to sunitinib. (A) Cell viability curves of 786-O (sunitinib-resistant) and (B) Caki-1 (sunitinib-resistant) cell lines treated with increasing concentrations of sunitinib, with or without 4-PBA (2 mM) pretreatment. (C) Summary of IC<sub>50</sub> values of sunitinib in sunitinib-resistant 786-O cells with 4-PBA intervention. (D) Summary of IC<sub>50</sub> values of sunitinib in sunitinib-resistant Caki-1 cells with 4-PBA intervention. IC<sub>50</sub> values were calculated using GraphPad Prism. RD, resistant; SD, sensitive; 4-PBA, 4-phenylbutyrate; ccRCC, clear cell renal cell carcinoma.

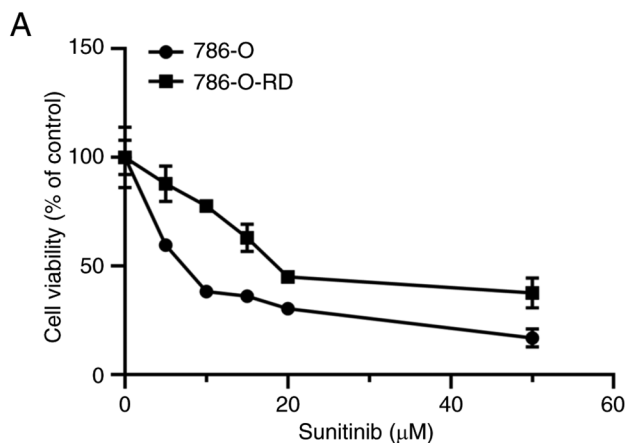

|                       | 786-O | 786-O-RD |
|-----------------------|-------|----------|
| IC <sub>50</sub> (μM) | 7.132 | 24.67    |

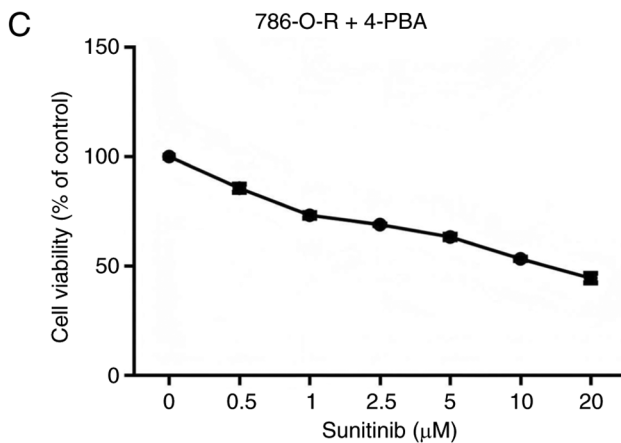

|                       | 786-O-R + 4-PBA |
|-----------------------|-----------------|
| IC <sub>50</sub> (μM) | 13.22           |

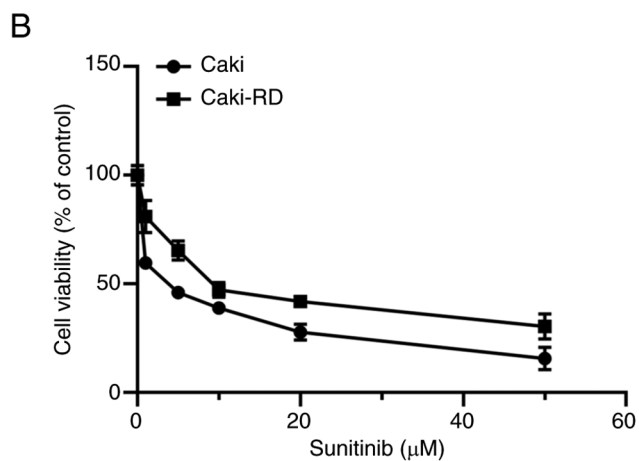

|                       | Caki  | Caki-RD |
|-----------------------|-------|---------|
| IC <sub>50</sub> (μM) | 8.084 | 16.79   |

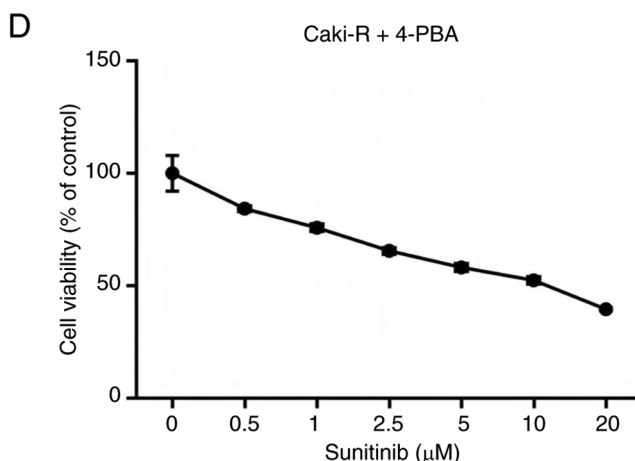

|                       | Caki-R + 4-PBA |
|-----------------------|----------------|
| IC <sub>50</sub> (μM) | 9.76           |
